# Supplementary material for: Evaluation of DNA segments in 2′-modified RNA sequences in designing efficient splice switching antisense oligonucleotides
Source: Royal Society of Chemistry journal article supplement (doi:10.1039/d1ra00878a), 2021-01-01
Supplement: d1ra00878a1.pdf [file d1ra00878a1.pdf]

## Evaluation of DNA segments in 2'-modified RNA sequences in designing efficient splice switching antisense oligonucleotides

Bao T. Le<sup>a,b</sup>, Sudhir Agarwal<sup>c\*</sup> and Rakesh N. Veedu<sup>a,b\*</sup>

<sup>a</sup> Centre for Molecular Medicine and Innovative Therapeutics, Murdoch University, 90 South street, Murdoch, Perth, WA, 6150, Australia

<sup>b</sup> Perron Institute for Neurological and Translational Science, Ground/8 Verdun St, Nedlands, Perth, WA, 6009, Australia

<sup>c</sup> ARNAY Sciences LLC, Shrewsbury, MA 01545, USA

\*To whom correspondence should be addressed. Tel: +61 8 93602803; Email: R.Veedu@murdoch.edu.au, sagrawal@arnaysciences.com

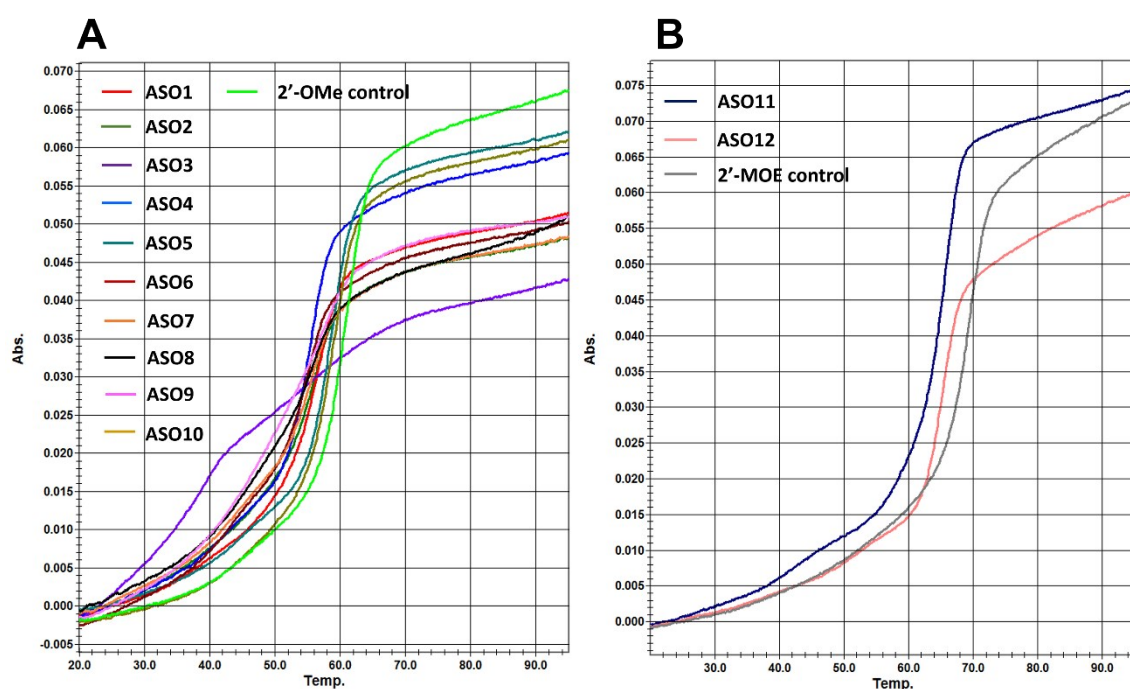

**Figure S1.** Melting curves analysis of the ASOs used in this study including ASO1-10 (A) and ASO11-12 (B).

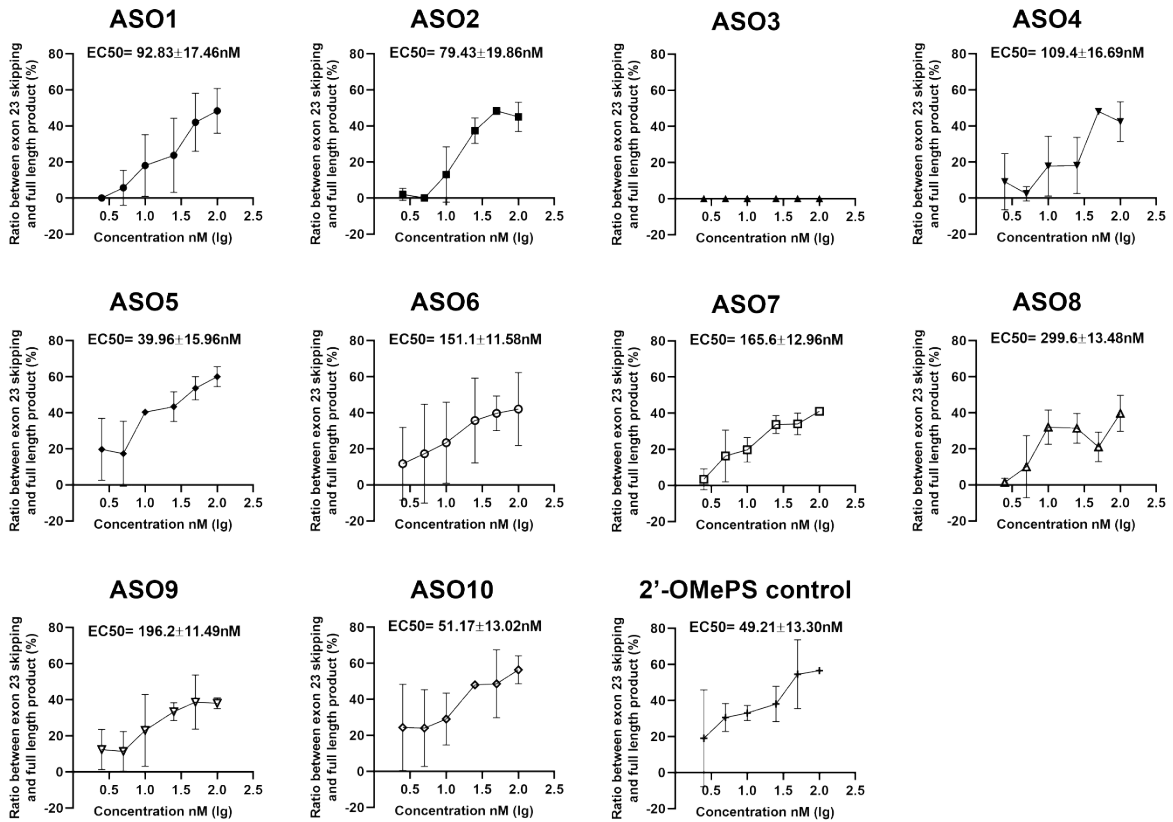

**Figure S2.** Evaluation of half maximal effective concentration (EC<sub>50</sub>) of ASO1-10 and 2'-OMePS control ASO used in this study. Error bars represent the standard deviation of mean. EC<sub>50</sub> values were calculated based on three independent experimental data.

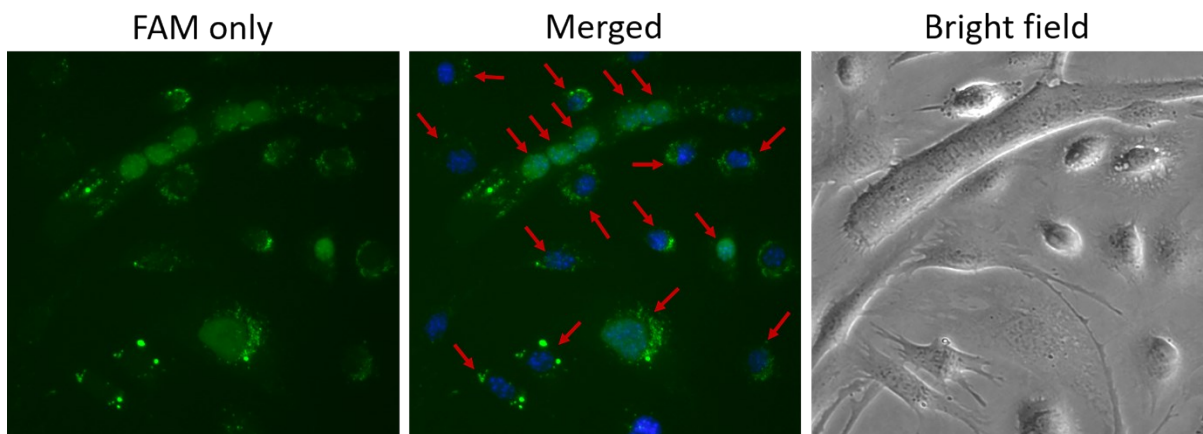

**Figure S3.** Cell internalization study of ASO10 in *H2K mdx* myotubes. Red arrows indicate nuclei with internalized fluorescent ASO10 (green dots); Merged: fluorescent image merged with nuclear staining;

Fluorescent ASO10 sequence: 5'-FAM-GGCCAAACCUCGGCUUACCT-3'), Black: 2'-OMe PS nucleotides, red: DNA PS nucleotides.
